# Supplementary material for: Stable water isotopes and accumulation rates in the Union Glacierregion, West Antarctica over the last 35 years
Source: Copernicus journal article supplement (doi:10.5194/tc-2018-161), 2018-10-04
Supplement: Supplementary file 1 [file tc-2018-161-supplement.pdf]

## Supplementary information

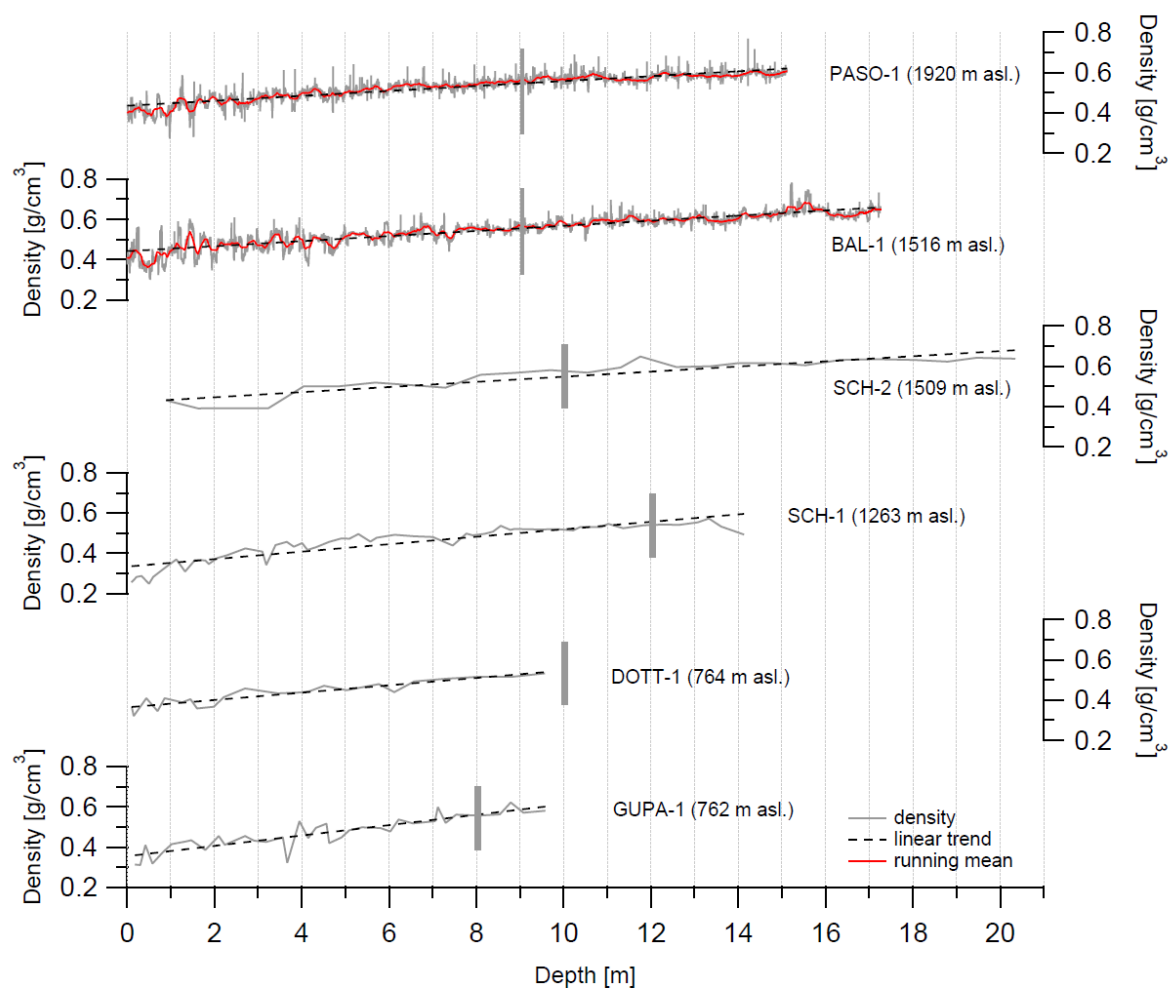

S1: Density profiles of the six firn cores from Union Glacier (UG). Density profiles of cores BAL-1 and PASO-1 were obtained by X-ray microfocus tomography and are at  $< 1\text{ mm}$  resolution. The running mean is shown in red. The window size for calculating the running mean was chosen to be 1700 points for BAL-1 and 1250 points for PASO-1 as these values correspond to a period of approximately half a year within the respective core record. For each core the linear trend of increasing density with depth due to firn compaction and the approximate depth of the snow-firn-density boundary ( $0.55\text{ g/cm}^3$ ; grey bar) are indicated. Note that for core DOTT-1 the snow-firn-density boundary is not reached within the drill depth and therefore its location was determined by linear extrapolation at the lower end of the core.

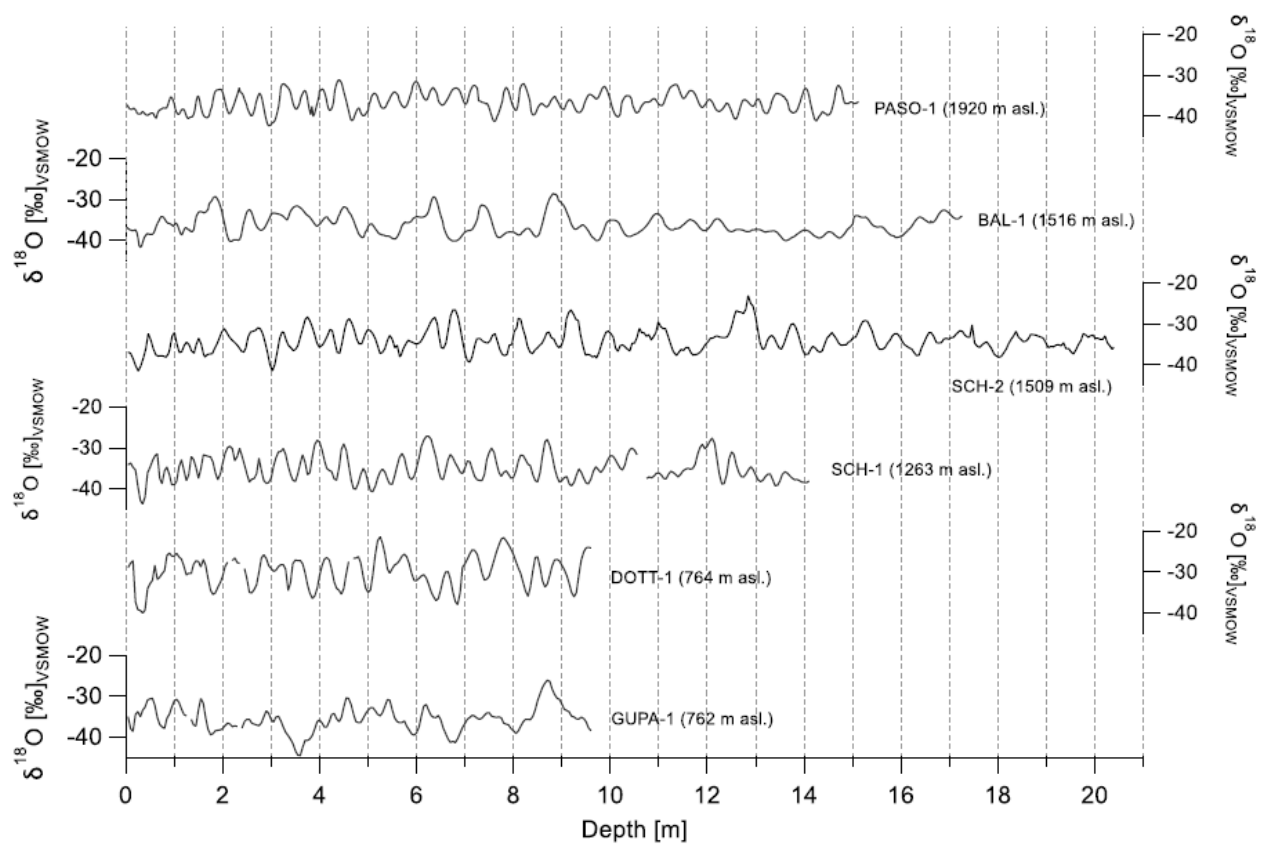

S2: Profiles of the stable water isotope composition ( $\delta^{18}\text{O}$ ) of the six firn cores from UG with respect to depth.

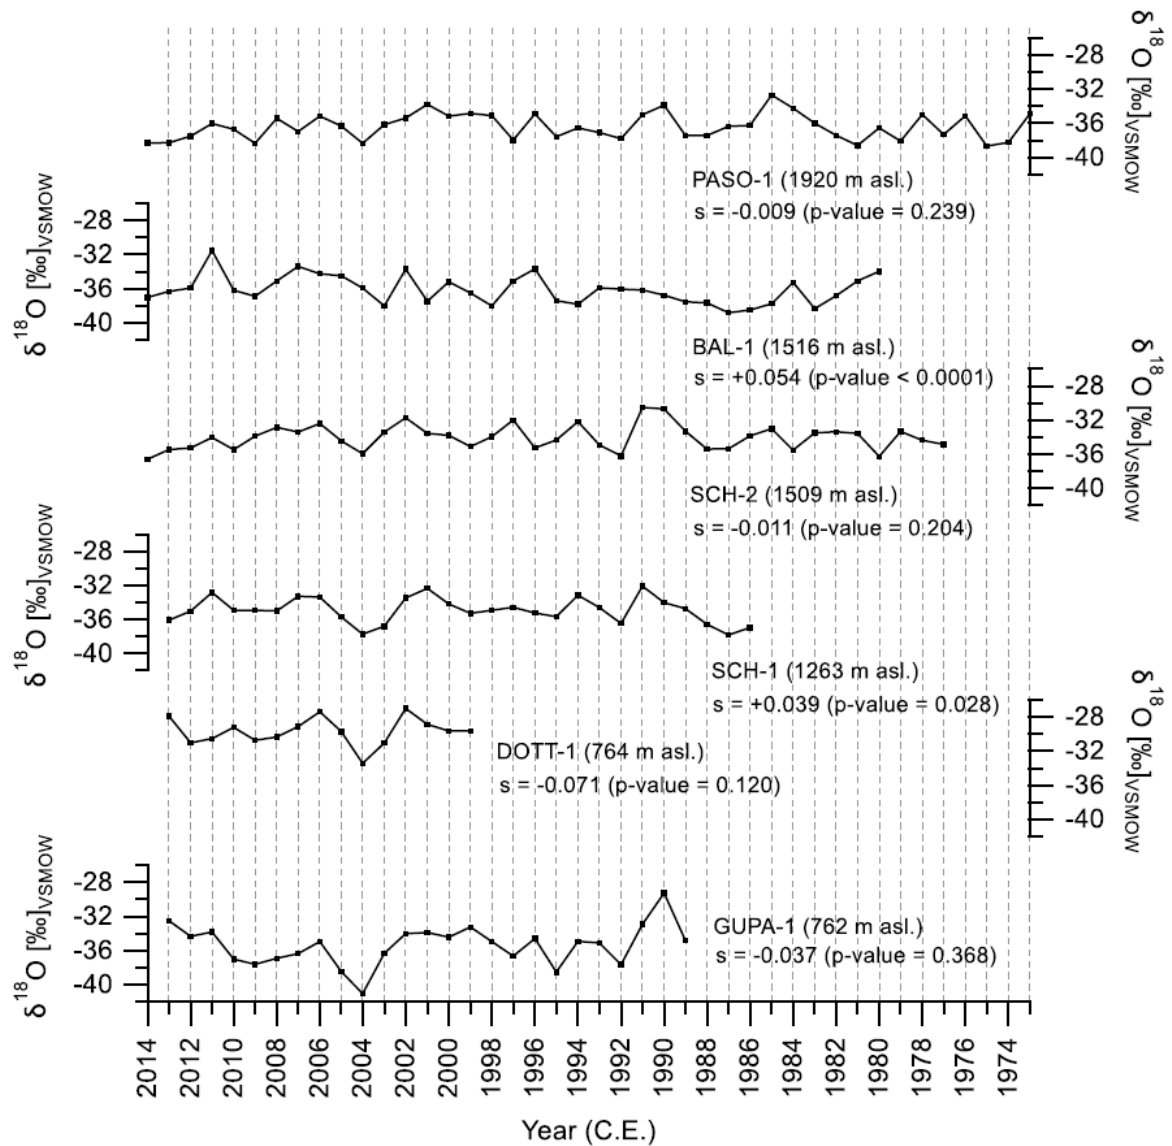

S3: Non-standardized annual mean stable oxygen isotope composition of the six firn cores from UG for the period covered by the respective core. Sen slopes (s) and p-values are given for each core.

S4: Results of cross-correlation analysis for accumulation rates and mean annual stable water isotope composition of the six firn cores from UG. Prominent correlations are marked bold and if statistically significant (p-value < 0.01,  $\alpha = 0.05$ ) in red and bold.

| Accumulation                            | GUPA-1 | DOTT-1       | SCH-1        | SCH-2        | BAL-1        | PASO-1        |
|-----------------------------------------|--------|--------------|--------------|--------------|--------------|---------------|
| <b>GUPA-1</b>                           | 1      | -0.076       | <b>0.422</b> | <b>0.449</b> | 0.250        | <b>-0.428</b> |
| p-value                                 | 0      | 0.787        | 0.036        | 0.024        | 0.229        | 0.033         |
| <b>DOTT-1</b>                           |        | 1            | 0.399        | 0.314        | <b>0.444</b> | 0.262         |
| p-value                                 |        | 0            | 0.140        | 0.255        | 0.098        | 0.346         |
| <b>SCH-1</b>                            |        |              | 1            | <b>0.626</b> | <b>0.335</b> | -0.053        |
| p-value                                 |        |              | 0            | 0.000        | 0.081        | 0.789         |
| <b>SCH-2</b>                            |        |              |              | 1            | <b>0.365</b> | <b>-0.303</b> |
| p-value                                 |        |              |              | 0            | 0.031        | 0.065         |
| <b>BAL-1</b>                            |        |              |              |              | 1            | -0.157        |
| p-value                                 |        |              |              |              | 0            | 0.368         |
| <b>PASO-1</b>                           |        |              |              |              |              | 1             |
| p-value                                 |        |              |              |              |              | 0             |
| <b><math>\delta^{18}\text{O}</math></b> |        |              |              |              |              |               |
| <b>GUPA-1</b>                           | 1      | <b>0.634</b> | <b>0.548</b> | <b>0.454</b> | 0.005        | <b>0.595</b>  |
| p-value                                 | 0      | 0.011        | 0.005        | 0.023        | 0.982        | 0.002         |
| <b>DOTT-1</b>                           |        | 1            | <b>0.585</b> | <b>0.521</b> | 0.228        | 0.433         |
| p-value                                 |        | 0            | 0.022        | 0.046        | 0.414        | 0.107         |
| <b>SCH-1</b>                            |        |              | 1            | <b>0.658</b> | <b>0.441</b> | <b>0.480</b>  |
| p-value                                 |        |              | 0            | 0.000        | 0.019        | 0.010         |
| <b>SCH-2</b>                            |        |              |              | 1            | 0.022        | <b>0.359</b>  |
| p-value                                 |        |              |              | 0            | 0.900        | 0.027         |
| <b>BAL-1</b>                            |        |              |              |              | 1            | 0.006         |
| p-value                                 |        |              |              |              | 0            | 0.973         |
| <b>PASO-1</b>                           |        |              |              |              |              | 1             |
| p-value                                 |        |              |              |              |              | 0             |
| <b><math>\delta\text{D}</math></b>      |        |              |              |              |              |               |
| <b>GUPA-1</b>                           | 1      | <b>0.567</b> | <b>0.501</b> | <b>0.471</b> | -0.018       | <b>0.565</b>  |
| p-value                                 | 0      | 0.028        | 0.011        | 0.018        | 0.932        | 0.003         |
| <b>DOTT-1</b>                           |        | 1            | <b>0.597</b> | 0.569        | 0.285        | 0.424         |
| p-value                                 |        | 0            | 0.019        | 0.027        | 0.304        | 0.115         |
| <b>SCH-1</b>                            |        |              | 1            | <b>0.707</b> | <b>0.426</b> | <b>0.435</b>  |
| p-value                                 |        |              | 0            | 0.000        | 0.024        | 0.021         |
| <b>SCH-2</b>                            |        |              |              | 1            | 0.028        | <b>0.341</b>  |
| p-value                                 |        |              |              | 0            | 0.873        | 0.036         |
| <b>BAL-1</b>                            |        |              |              |              | 1            | -0.037        |
| p-value                                 |        |              |              |              | 0            | 0.831         |
| <b>PASO-1</b>                           |        |              |              |              |              | 1             |
| p-value                                 |        |              |              |              |              | 0             |

# d excess

|               |   |              |        |        |        |        |
|---------------|---|--------------|--------|--------|--------|--------|
| <b>GUPA-1</b> | 1 | -0.059       | -0.119 | 0.244  | -0.100 | 0.188  |
| p-value       | 0 | 0.836        | 0.572  | 0.240  | 0.635  | 0.368  |
| <b>DOTT-1</b> | 1 | <b>0.455</b> | -0.053 | -0.296 | -0.391 |        |
| p-value       | 0 | 0.088        | 0.852  | 0.284  | 0.150  |        |
| <b>SCH-1</b>  |   |              | 1      | -0.043 | 0.081  | 0.095  |
| p-value       |   |              | 0      | 0.829  | 0.683  | 0.632  |
| <b>SCH-2</b>  |   |              |        | 1      | -0.112 | 0.149  |
| p-value       |   |              |        | 0      | 0.515  | 0.371  |
| <b>BAL-1</b>  |   |              |        |        | 1      | -0.006 |
| p-value       |   |              |        |        | 0      | 0.974  |
| <b>PASO-1</b> |   |              |        |        |        | 1      |
| p-value       |   |              |        |        |        | 0      |

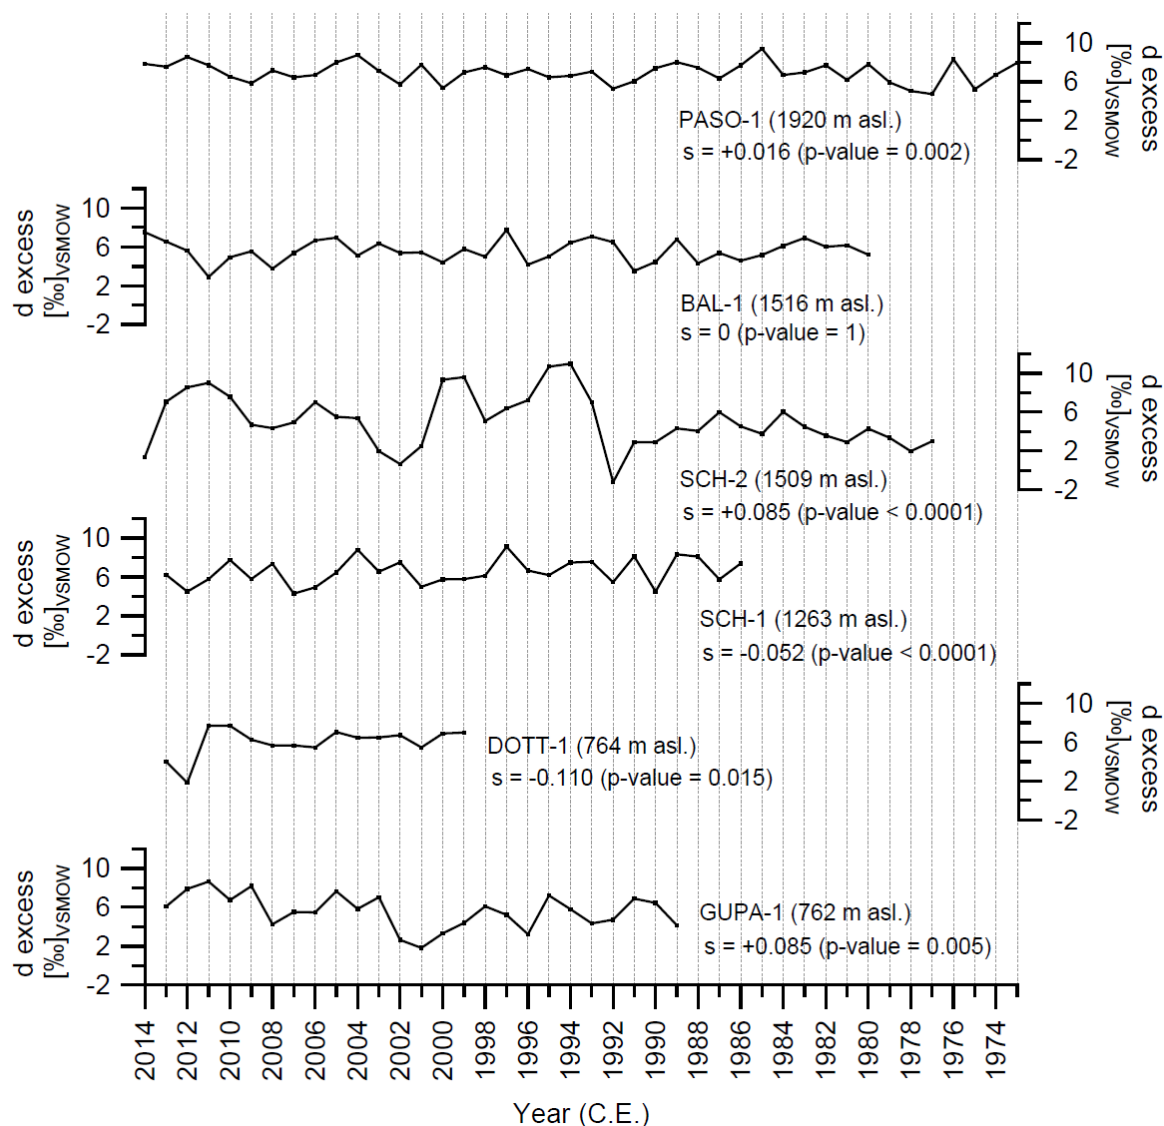

S5: Non-standardized annual mean d excess of the six firn cores from UG for the period covered by the respective core. Sen slopes (s) and p-values are given for each core.

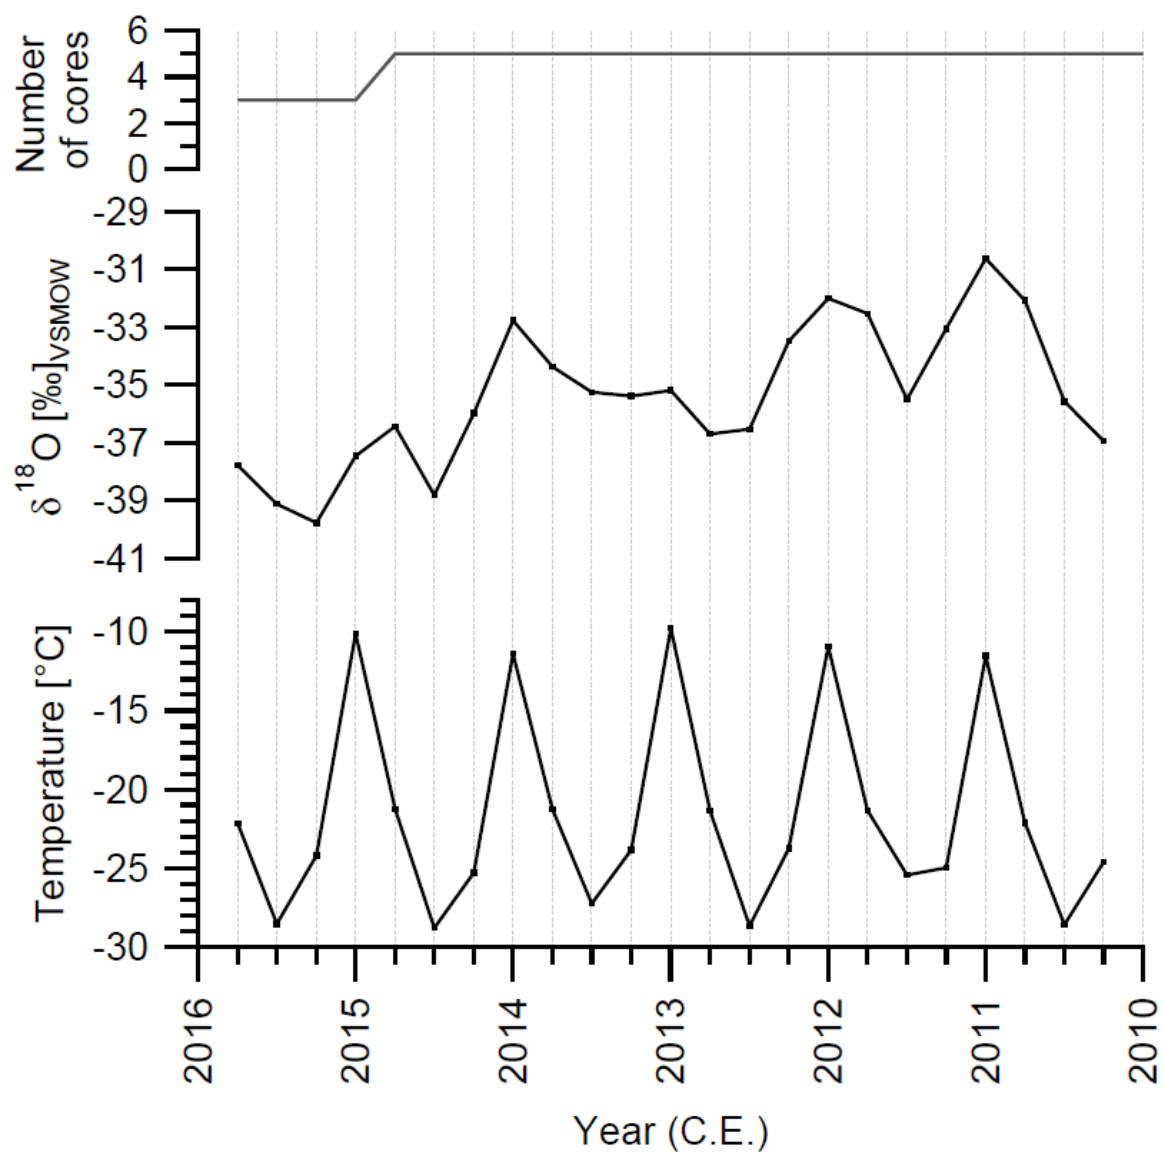

S6: Non-standardized seasonal means of near-surface air temperature (derived from the AWS composite record) and firm core  $\delta^{18}\text{O}$  in the UG region for the period 2010–2015.
